# Supplementary material
Source: Springer Nature journal article supplement (https://www.springermedizin.de/resource/supplementary/13075_2011_3282_MOESM2_ESM.pdf/9694186)

**(a)**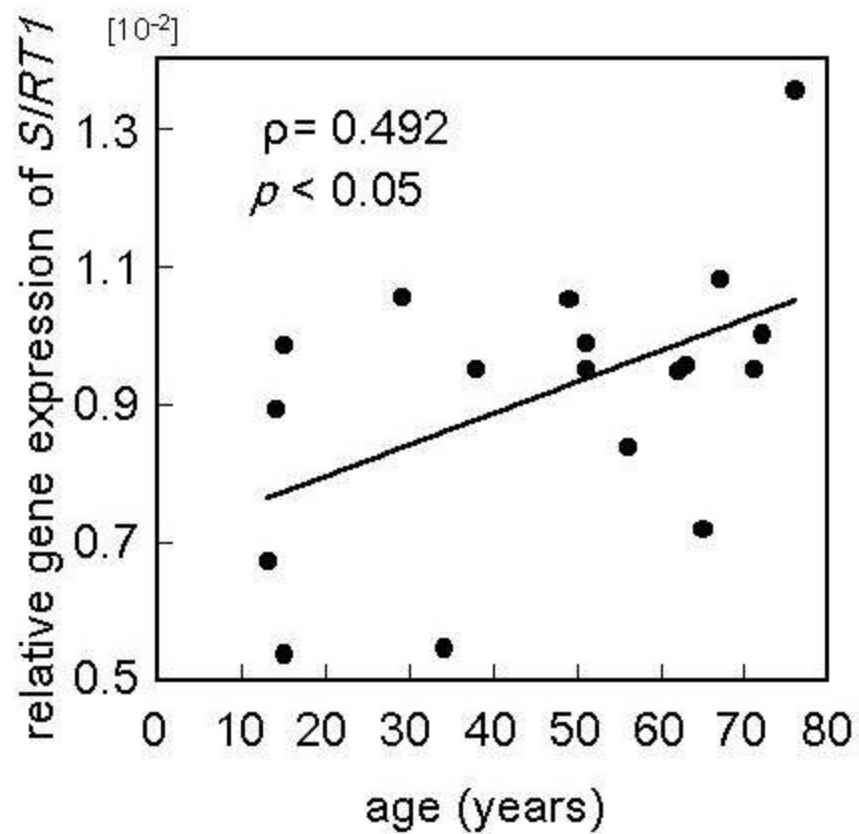**(b)**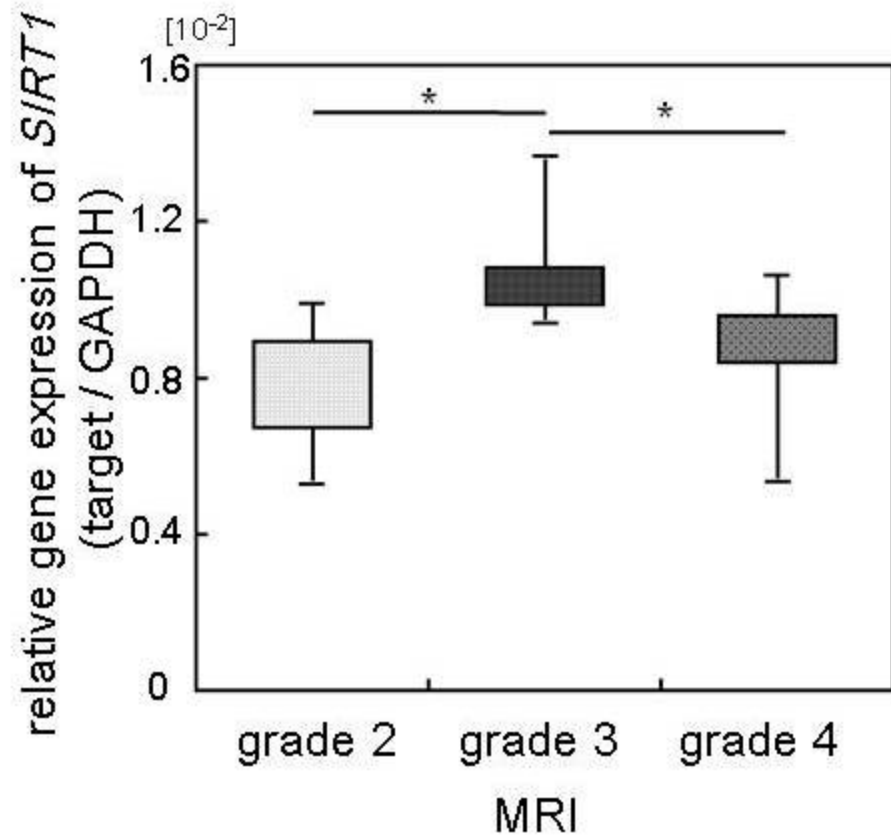

Supplement: MOESM2 [file 9694186]
